# Supplementary material
Source: PubMed Central journal article supplement (PMC10316675)
Supplement: NIHMS1903527-supplement-Supporting_Material.pdf [file NIHMS1903527-supplement-Supporting_Material.pdf]

**Supporting Tables:**

Supporting Table 1: *FH* Variant Classification Scheme

Supporting Table 2: Summarized data from available clinical cohorts

Supporting Table 3: Identified Variants in ExAC and 1000GP for each Cumulative Estimate

Supporting Table 4: Estimates of Lifetime Kidney Cancer Risk in HLRCC by Tier (LOF- loss of function)

**Supporting Figures:**

Supporting Figure 1: Mutational Map of *FH* Alterations by Location and Domain. The Variant Tiers 1-3) are color-coded and the height denotes the number of alterations observed. For the start loss position, two split variances are not shown.
